# Supplementary material for: Tracking local and global structural changes in a protein by cold ion spectroscopy
Source: Royal Society of Chemistry journal article supplement (doi:10.1039/d2cp00217e), 2022-01-01
Supplement: d2cp00217e1.pdf [file d2cp00217e1.pdf]

## Electronic Supplementary Information

### **Tracking Local and Global Structural Changes in a Protein by Cold Ion Spectroscopy**

Andrei Zviagin, Vladimir Kopysov, Natalia S. Nagornova, Oleg V. Boyarkin\*

<sup>1</sup>Laboratoire de Chimie Physique Moléculaire, École Polytechnique Fédérale de Lausanne, CH-1015  
Lausanne, Switzerland

\*Correspondence to: oleg.boiarkin@epfl.ch

## Table of Contents

|                                                                                                                           |    |
|---------------------------------------------------------------------------------------------------------------------------|----|
| <b>Figure S1a.</b> Mass spectra of protonated Ubi.....                                                                    | S3 |
| <b>Figure S1b.</b> UV fragment MS of protonated Ubi <sup>7+</sup> .....                                                   | S3 |
| <b>Figure S2.</b> Photofragment UV spectra of Ubi <sup>7+</sup> and Ubi <sup>8+</sup> in the region of Phe absorption. .. | S4 |
| <b>Figure S3.</b> Photo fragment UV spectra of Ubi <sup>n+</sup> for n=8-12 in the region of Phe absorption .             | S5 |
| <b>Figure S4.</b> Redshifts of UV absorption by neutral phenol in non-covalent complexes .....                            | S6 |
| <b>Figure S5.</b> Photofragment UV spectrum of Ubi <sup>5+</sup> .....                                                    | S7 |
| <b>Additional references.</b> .....                                                                                       | S7 |

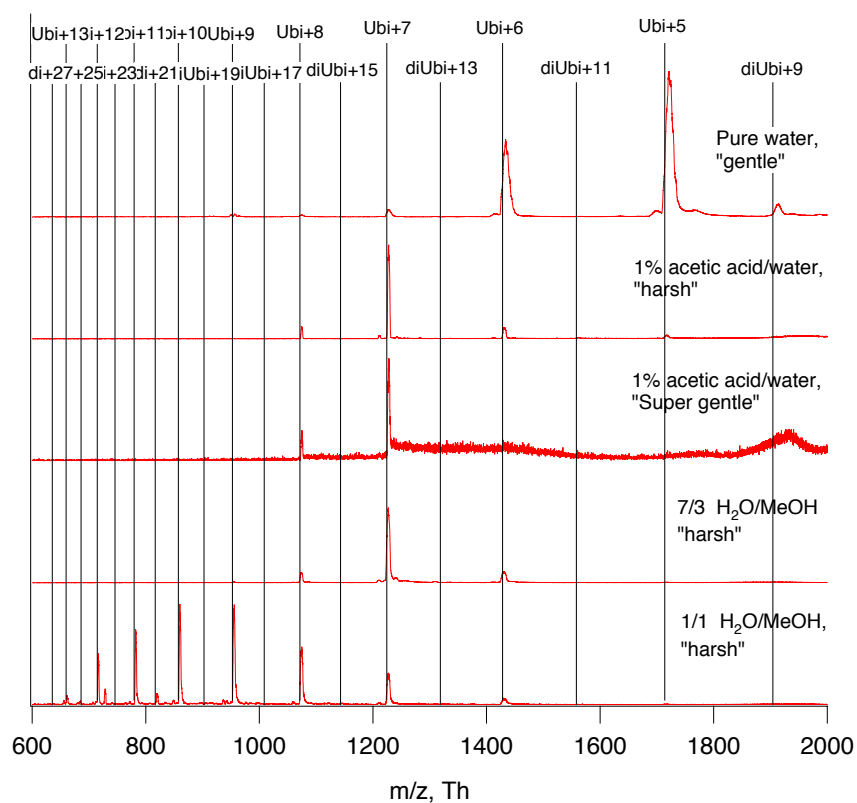

**Figure S1a.** Mass spectra showing charge-distribution of protonated ubiquitin electrosprayed from different solutions and under different (“super gentle”, “gentle” and “harsh”) conditions of ESI.

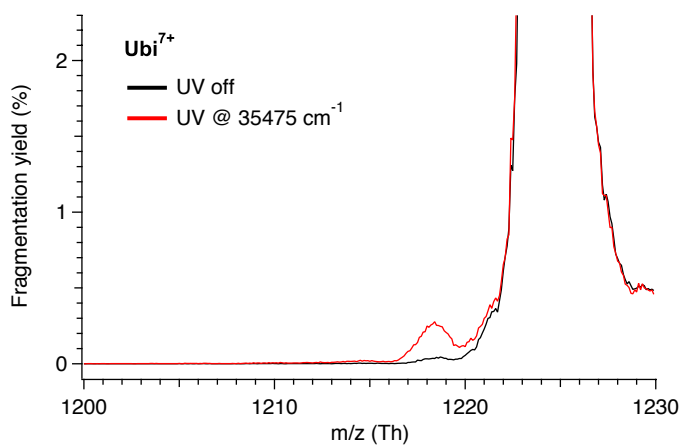

**Figure S1b.** UV fragment MS of Ubi-7H<sup>7+</sup> (red trace) and of this protein with UV light blocked (black trace). The ion peak intensity is normalized on the intensity of the parent ion peak (100%).

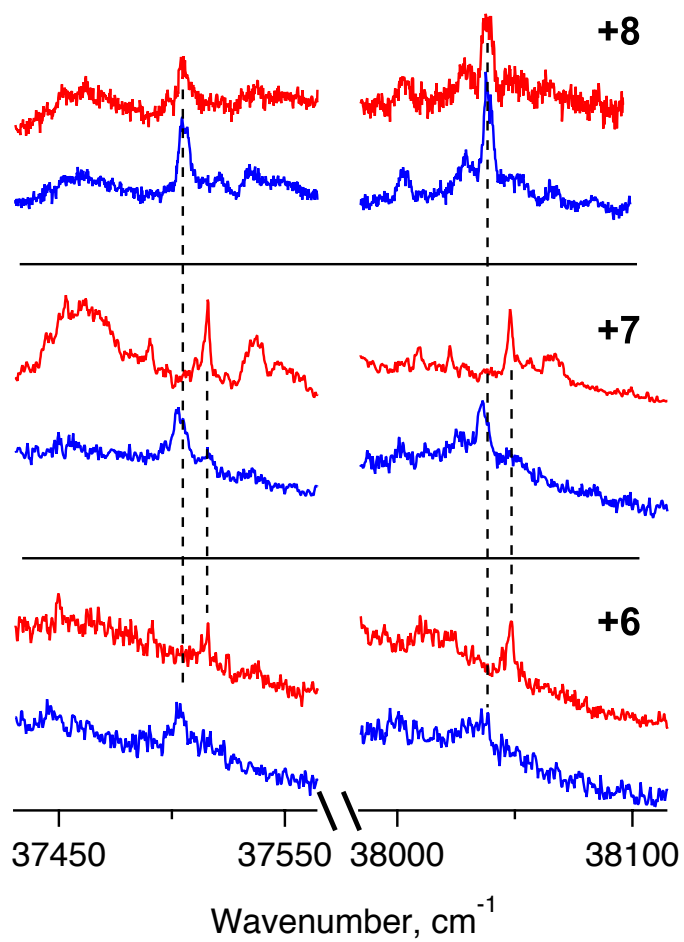

**Figure S2.** Photofragmentation UV spectra of Ubi<sup>7+</sup> and Ubi<sup>8+</sup> in the region of absorption by Phe residue. The protein was electrosprayed from water solution with 1% of acetic acid under the “gentle” (blue traces) and “harsh” (red traces) conditions of ESI.

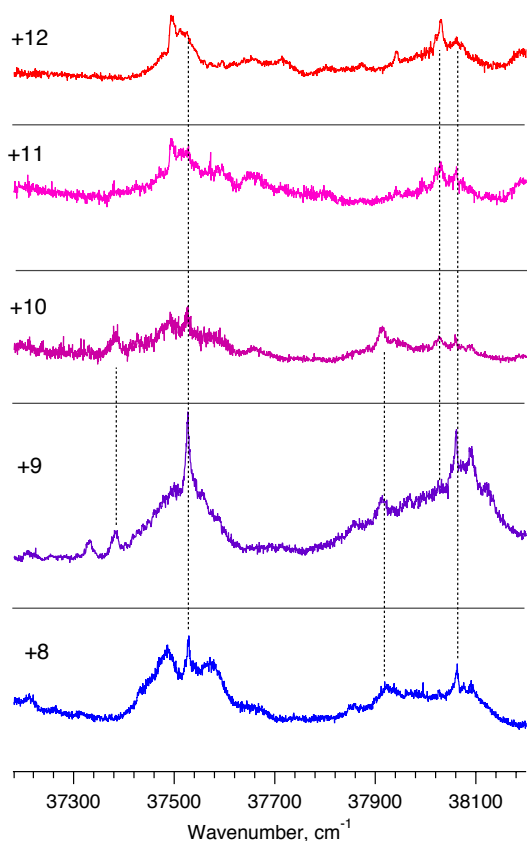

**Figure S3.** Photo fragmentation UV spectra of Ubi<sup>n+</sup> for n=8-12 in the region of absorption by Phe residue. The protein was electrosprayed from water/methanol/acetic acid (50/50/1) solution under the “harsh” conditions of ESI. Vertical dashed line show alignment of sharp peaks in different spectra.

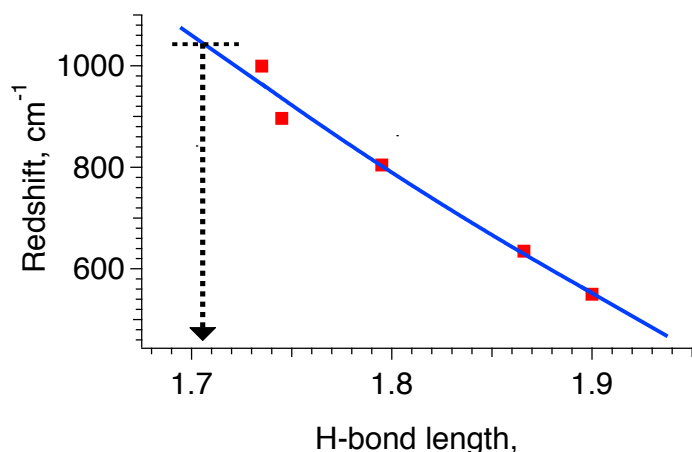

**Figure S4.** The available data (red squares) for the red shifts of the UV band origin of neutral phenol as a function of the H-bond length between the hydrogen of the phenol hydroxyl and the nitrogen of the acceptor molecules in the studied non-covalent complexes.<sup>[1]</sup> The data points were fitted by a power function  $y(x) = 7300 - 1850 \cdot x^{-1.7}$  that exhibits a nearly linear dependence. The vertical dotted line shows the largest red shift detected for the UV band origin of Tyr residue in this work for protonated ubiquitin ( $n=6-8$ ) and its complexes with 5 and 10 water molecules; the dotted arrow line points to the corresponding most likely minimal length of the H-bond ( $\sim 1.7 \text{ \AA}$ ). The evaluation does not consider the variations of the bond angle.

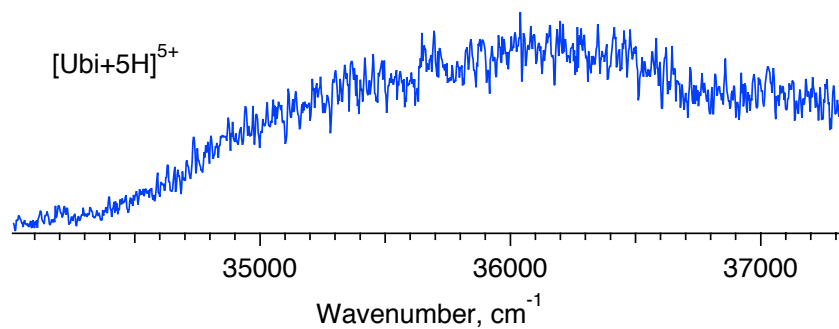

**Figure S5.** Photofragment UV spectrum of  $[Ubi+5H]^{5+}$ , produced from pure water solution under “harsh” ESI conditions.

#### **Additional references**

- [1] a) D. Solgadi, C. Jovet, A. Tramer, *J. Phys. Chem.* **1988**, *92*, 3313-3315;  
b) C. Jacoby, P. Hering, M. Schmitt, W. Roth, K. Kleinermanns, *Chem. Phys.* **1998**, *239*, 23-32;  
c) G. Pietraperzia, M. Pasquini, F. Mazzoni, G. Piani, M. Becucci, M. Biczysko, D. Michalski, J. Bloino, V. Barone, *J. Phys. Chem. A* **2011**, *115*, 9603-9611;  
d) H. Tachikawa, T. Iyama, *J. Phys. Chem. A* **2020**, *124*, 7893-7900.
